# Supplementary material for: Dual-Functionalized Nanoliposomes Achieve a Synergistic Chemo-Phototherapeutic Effect
Source: Int J Mol Sci. 2022 Oct 24;23(21):12817. doi: 10.3390/ijms232112817 (PMC9653560; doi:10.3390/ijms232112817)
Supplement: Supplementary file 1 [file ijms-23-12817-s001.zip]

Archive with 5 entries (5 files):
- 1. Control 24 h.avi
- 2. CPT11lip 24 h.avi
- 3. PpIXlip 24 h.avi
- 4. CPT11-PpIXlip 24 h.avi
- ijms-1971672-supplementary.pdf
